# Supplementary material for: Twisted-internal charge transfer (TICT) state mechanisms may be less common than expected
Source: Royal Society of Chemistry journal article supplement (doi:10.1039/d4nj00047a), 2024-01-01
Supplement: d4nj00047a1.pdf [file d4nj00047a1.pdf]

ARTICLE

## Supplementary Information: Twisted-Internal Charge Transfer (TICT) state mechanisms may be less common than expected

Received 00th January 20xx,  
 Accepted 00th January 20xx

DOI: 10.1039/x0xx00000x

Sara Joulaei-Zonouz,<sup>a</sup> Heather Wiebe,<sup>b</sup> Chris Prüfert,<sup>a</sup> and Hans-Peter Loock<sup>\*a</sup>

The supplementary electronic information provides additional information on the experimental absorption spectra of CBB and the calculated excited state energies and respective oscillator strengths. We also provide raw data for the Lippert-Mataga graph (Figure 4 of the main text). An additional figure illustrates that the dihedral angle  $\theta_3$  is the most meaningful coordinate when characterizing the TICT state. Another figure provides a different illustration of the electron redistribution between ground and excited state near the  $S_1$  state minimum conformation and at the TICT state minimum. Finally, a detailed step-by-step instruction on the computational determination of excitation and emission wavelengths is given.

**Table S1** Wavelengths, transition energies, and oscillator strengths obtained from Gaussian fits to the absorption spectra of CBB in cyclohexane and acetonitrile, and from ab initio calculations. Values were averaged for the two solvents.

### Additional data tables and figures

We show additional data tables and figures in support of some statement made in the main text where indicated.

#### 1. Absorption spectra and oscillator strengths

The absorption spectra of CBB were recorded in acetonitrile and in cyclohexane (Figure 2 in the main text) and were fitted to nine Gaussian functions.

Integration of the Gaussian fit curves allows us to estimate the oscillator strength,  $f$ , of the respective transitions (**Table S1**) using <sup>1</sup>

$$f = 4.31 \times 10^{-9} \frac{cm^2}{L mol} \int \epsilon(\theta) d\theta^*$$

MERGEFORMAT (1)

From **Table S1** it is apparent that all absorption bands in the 200 nm to 500 nm region are due to singlet-singlet transitions. The absorption maximum at 420 nm has been previously attributed to the  $S_0 \rightarrow S_1$  transition as described in the main text. The maxima at 341 nm, 314 and 292 nm are tentatively assigned to a vibrational progression ( $\nu_{0,1} \approx 2500 \text{ cm}^{-1}$ ) of the  $S_0 \rightarrow S_2$  transition and the maximum at 284 nm could be attributable to either (or both) the  $S_0 \rightarrow S_3$  or  $S_0 \rightarrow S_4$  transition, which were calculated to be near 295 nm and 291 nm, respectively. Higher lying transitions could not be reliably assigned. Our TD-DFT calculation found over 30 singlet-singlet transitions below 200 nm, and many were nearly degenerate.

The absorption maxima in non-polar cyclohexane and polar acetonitrile are almost identical except for the  $S_0 \rightarrow S_1$  transition

|                                            | absorption spectrum                                                  |       | ab initio                                                            |                |
|--------------------------------------------|----------------------------------------------------------------------|-------|----------------------------------------------------------------------|----------------|
|                                            | $\lambda_{\text{abs}} / \text{nm} ; E_{\text{abs}} / \text{cm}^{-1}$ | $f$   | $\lambda_{\text{abs}} / \text{nm} ; E_{\text{abs}} / \text{cm}^{-1}$ | $f$            |
| $S_0 \rightarrow S_1 (v'' \rightarrow v')$ | 426; 23400                                                           | 0.02  | 426; 23400                                                           | 0.64           |
| $S_0 \rightarrow S_2 (0 \rightarrow 0)$    | 341; 29400                                                           | 0.001 | 311; 32100                                                           | 0.26           |
| $S_0 \rightarrow S_2 (0 \rightarrow 1)$    | 314; 31900                                                           | 0.064 |                                                                      |                |
| $S_0 \rightarrow S_2 (0 \rightarrow 2)$    | 292; 34200                                                           | 0.002 |                                                                      |                |
| $S_0 \rightarrow S_3 / S_4$                | 284; 35200                                                           | 0.016 | 295; 34000 /<br>291; 34300                                           | 0.17 /<br>0.28 |
| $S_0 \rightarrow S_5$                      | 255; 39300                                                           | 0.049 |                                                                      |                |
| $S_0 \rightarrow S_6$                      | 236; 42300                                                           | 0.029 |                                                                      |                |
| $S_0 \rightarrow S_7$                      | 230; 43500                                                           | 0.060 |                                                                      |                |
| $S_0 \rightarrow S_8$                      | 203; 49300                                                           | 0.204 |                                                                      |                |

in which we see a small difference depending on the solvent  $\lambda_{\text{abs}}(\text{cyclohexane}) = 433 \text{ nm}$  and  $\lambda_{\text{abs}}(\text{MeCN}) = 426 \text{ nm}$ .

#### 2. EEM Spectra and Analysis

**Table SII** shows peak maxima extracted by Gaussian fitting to the raw EEM data for the 21 mixtures of acetone and toluene. As a function of the volume fraction of acetone, we provide for the  $S_1$  state and the  $S_2$  state:

- the orientation polarization,  $\Delta f$ , calculated as described in the main text,
- the excitation and emission wavelengths, and
- the calculated Stokes shifts for the first excited state,  $V_{SS1}$ , and the second excited state,  $V_{SS2}$ .

**Table SIII** provides the same information for the five neat solvents that were added in this study. It supplements Table I in the main text. The data of Table SIII are displayed in Figure 4 of the main text.

<sup>a</sup> Dept. of Chemistry, University of Victoria, Victoria, BC, V8W 5C2, Canada.

<sup>b</sup> Dept. of Chemistry, Vancouver Island University, Nanaimo, BC, V9R 5S5, Canada



**Table SII** Raw EEM data for 21 mixtures of acetone and toluene: Volume fraction of acetone, orientation polarization,  $\Delta f$ , calculated as described in the main text, excitation and emission wavelengths and calculated Stokes shifts,  $V_{SS}$ , (in  $\text{cm}^{-1}$ ) for  $S_1$  state and  $S_2$  state. Wavelength data are accurate to within 0.5 nm.

| Volume fraction of acetone | $\Delta f$ | $\lambda_{Ex.}$ (nm) | $\lambda_{Em.}$ (nm) | $V_{SS1}$ | $\lambda_{Ex.}$ (nm) | $\lambda_{Em.}$ (nm) | $V_{SS2}$ |
|----------------------------|------------|----------------------|----------------------|-----------|----------------------|----------------------|-----------|
| 0.00                       | 0.01<br>2  | 323.7                | 568.0                | 13290     | 439.0                | 567.9                | 517<br>0  |
| 0.05                       | 0.03<br>1  | 336.5                | 574.8                | 12319     | 439.1                | 574.8                | 537<br>6  |
| 0.10                       | 0.05       | 337.8                | 579.1                | 12332     | 439.2                | 579.2                | 550<br>1  |
| 0.15                       | 0.06<br>7  | 338.8                | 584.3                | 12405     | 439.2                | 584.4                | 565<br>9  |
| 0.20                       | 0.08<br>4  | 339.2                | 587.5                | 12458     | 438.8                | 587.6                | 577<br>1  |
| 0.25                       | 0.10<br>0  | 339.5                | 590.0                | 12502     | 438.8                | 590.0                | 584<br>2  |
| 0.30                       | 0.11<br>6  | 339.7                | 593.2                | 12576     | 438.6                | 593.1                | 594<br>1  |
| 0.35                       | 0.13<br>1  | 340.1                | 594.8                | 12592     | 438.5                | 594.5                | 598<br>8  |
| 0.40                       | 0.14<br>5  | 340.0                | 596.5                | 12648     | 438.2                | 596.6                | 605<br>9  |
| 0.45                       | 0.15<br>9  | 341.0                | 603.6                | 12758     | 437.4                | 603.6                | 629<br>6  |
| 0.50                       | 0.17<br>2  | 340.6                | 603.1                | 12778     | 437.2                | 603.3                | 629<br>5  |
| 0.55                       | 0.18<br>-  | 340.8                | 605.5                | 12831     | 436.3                | 605.0                | 638<br>-  |

**Table SIII** Raw EEM data for 5 neat solvents: Orientation polarization,  $\Delta f$ , calculated as described in the main text, excitation and emission wavelengths and calculated Stokes shifts,  $V_{SS}$ , (in  $\text{cm}^{-1}$ ) for  $S_1$  state and  $S_2$  state. Wavelength data are accurate to within 0.5 nm.

|              | $\Delta f$ | $\lambda_{Ex.}$ (nm) | $\lambda_{Em.}$ (nm) | $V_{SS1}$ | $\lambda_{Ex.}$ (nm) | $\lambda_{Em.}$ (nm) | $V_{SS2}$ |
|--------------|------------|----------------------|----------------------|-----------|----------------------|----------------------|-----------|
| Acetonitrile | 0.30<br>5  | 312.40               | 619.1                | 15859     | 432.4                | 619.1                | 697<br>4  |
| Cyclohexane  | 0.00<br>0  | 317.292              | 533.8                | 12784     | 441.8                | 533.8                | 389<br>9  |
| Chloroform   | 0.14<br>8  | 314.218              | 592.3                | 14941     | 445.6                | 592.3                | 555<br>6  |

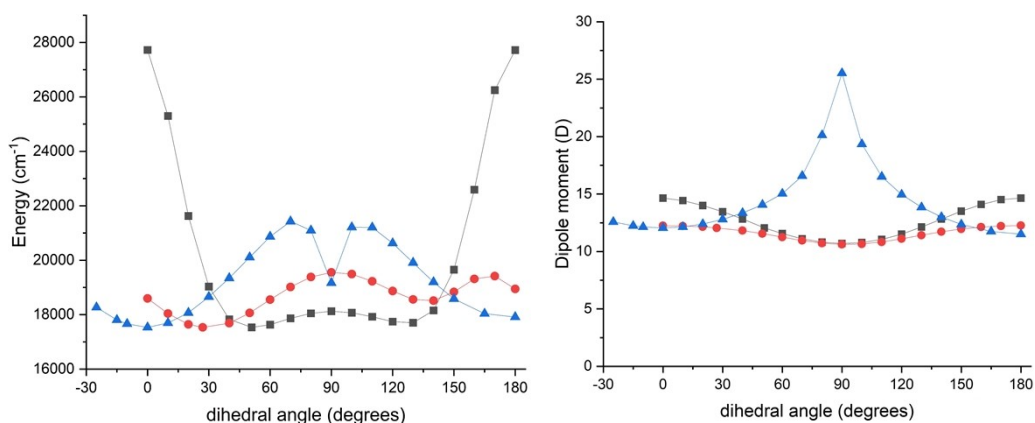

**Figure S1:**  $S_1$ -state energy (left) and dipole moment (right) of CBB in acetone calculated as functions of dihedral angles  $\theta_1$  (black squares),  $\theta_2$  (red circles), and  $\theta_3$  (blue triangles). The respective other coordinates were held at their  $S_1$  state minimum values, i.e.  $\theta_1 = 52^\circ$ ,  $\theta_2 = 28^\circ$ , and  $\theta_3 = 0$  degrees. Only variation of  $\theta_3$  leads to a large increase in dipole moment and a narrow energy minimum when the angle is close to 90 degrees.

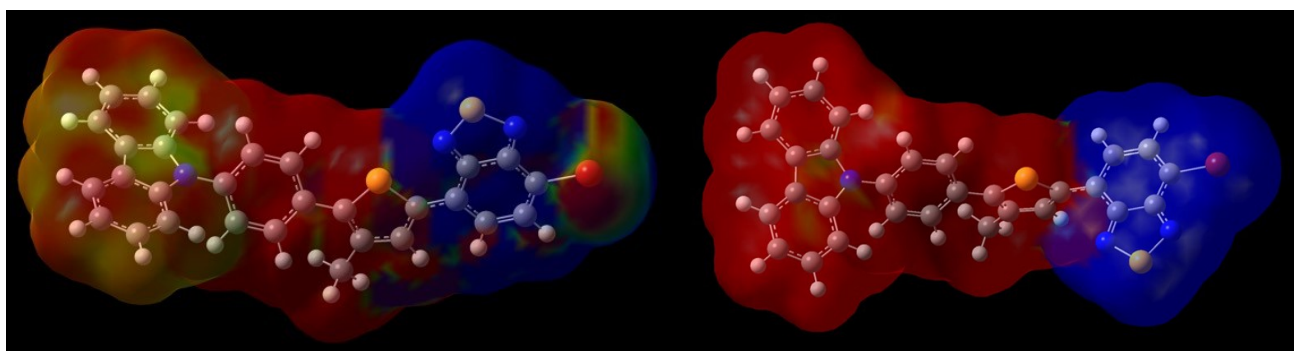

**Figure S2:** Electron density difference between excited state and ground state projected onto the SCF electron density surface for CBB in acetone when dihedral angle  $\theta_3$  is at (left)  $0^\circ$  and (right)  $90^\circ$ .

### 3. Determination of $S_1$ -state energies and dipole moments as a functions of dihedral angles

**Figure S1** shows the energy and dipole moments of CBB in its excited  $S_1$ -state in acetone. The values are calculated as described in the main text. All coordinates, i.e. bond lengths and angles, were held at the  $S_1$  state minimum values, i.e.  $\theta_1 = 52^\circ$ ,  $\theta_2 = 28^\circ$ , and  $\theta_3 = 0$  degrees, while only the dihedral angles  $\theta_1$ ,  $\theta_2$ , and  $\theta_3$  were scanned in turn. The computational experiment showed that only a change of dihedral angle  $\theta_3$  resulted in a large increase in dipole moment and a narrow energy minimum, i.e. this angle is the most meaningful reaction coordinate when trying to characterize the TICT state at which  $\theta_3 = 90$  degrees.

### 4. Charge distribution of CBB in its excited state

**Figure S2** provides another illustration of the dramatic difference in charge distribution in the CBB excited state when dihedral angle  $\theta_3$  is at either zero degrees or at right angles. The difference in charge distribution between the  $S_0$  state and  $S_1$  state is shown as a blue-red colour map on top of the electron density iso-surface. If  $\theta_3$  is close to zero degrees, the electron density shifts from the phenylthiophene (PT) bridge and from the bromine atom to the benzothiadiazole (BTD) acceptor group. In the TICT state ( $\theta_3 = 90^\circ$ ) we observe the expected electron redistribution from the donor and linker groups to the

benzothiadiazole (BTD) acceptor group. The two conformations correspond to the two lower panels in Figure 7 of the main text.

### 5. Step-by-Step ab initio calculation of the energies and dipoles

The ab initio calculations were performed using Gaussian 16 to identify the molecular properties that are responsible for the observed solvatochromic shift.<sup>2</sup> We followed the procedure described in the Gaussian application notes by Guido and Caprasecca.<sup>3-7</sup> The energy calculations were performed in four steps as shown in **Figure S3**. We determine the following molecular properties:

- (1) The  $S_0$ -state conformation and energy of CBB in the Franck-Condon region. The molecular structure was optimized in the gas phase and in acetone and toluene solvent environments using density functional theory with the B3LYP/6-31+G(d,p) functional and basis set<sup>8</sup> and the integral equation formalism variant of the Polarizable Continuum Model, IEFPCM.<sup>9</sup>

```
#p opt b3lyp/6-31+g(d,p) scrf=(iefpcm,
solvent=acetone) polar
```

The optimized ground state configuration was then used to calculate the ground state dipole moments using DFT with CAM-B3LYP/6-31+G(d,p).

(2) The  $S_1$  excited state energies and  $S_1$  dipole moments determined in the same Franck-Condon region and in a dielectric continuum but without the reaction field. In the example below, the calculation includes four singlet excited states; the energy is determined for the first excited state (root=1). This  $S_1$  excited state is calculated using the CAM-B3LYP/6-31+G(d,p) model with the corrected Linear Response, cLR by Caricato et al.<sup>4</sup> (PisaLR) where the solvent environment is “frozen” to reflect the near-instantaneous nature of the excitation process using IOP(10/74=10).

```
#p td=(singlets,nstates=4,root=1,noneq)
cam-b3lyp/6-31+g(d,p)/def2sv
scrfl=(solvent=acetone,pisalr)
iop(10/74=10)
```

This calculation also provided the excitation energy from which the TD-DFT ground state energy was obtained by subtracting the excitation energy from the  $S_1$  energy (Table III of the main text). The  $S_0$  ground state energy for CBB in the gas phase that was obtained in this way was used as a reference for all other energy values in the main text.

(3) The geometry of the molecule once it is relaxed to its global minimum on the  $S_1$  excited state potential energy surface. We perform a full geometry optimization of the isolated molecule and of the molecule in the two solvent environments using TD-DFT<sup>2</sup> and the CAM-B3LYP/6-31+G(d,p) (IEF-PCM) model.<sup>8,10</sup> Here, the geometry of the CBB molecule is optimized in the first excited state (root=1).

```
#p opt td=(singlets,nstates=1,root=1,eqsolv)
cam-b3lyp/6-31+g(d,p)/def2sv
scrfl=(iefpcm,solvent=acetone)
polar
```

In this step, the solvent is equilibrated with solute in the excited state (eqsolv).

(4) The ground and  $S_1$  excited state energies of CBB in the geometry corresponding to the potential energy minimum of the  $S_1$  state. Their difference was determined in gas phase and in the acetone and toluene solvent environments. The calculation was done in two steps. In Step 4A, the reaction field of the solute must converge with the optimized geometry for the solute in the first excited state. As in step (2) the state-specific equilibrium solvation of the excited state at its equilibrium geometry (IOP(10/74=20)) is determined. The solvation correction needs to be saved for use in the next step (nonequilibrium=save).

```
#p opt td=(singlets,nstates=4,root=1,eqsolv)
cam-b3lyp/6-31+g(d,p)/def2sv
scrfl=(pisalr,solvent=acetone,read,nonequilibrium=save)
iop(10/74=20)
```

In the output file of this job, the total energy of the molecule which is equilibrated with solvent in the excited state before emission based on the corrected linear response can be found in the section “PCM State-Specific 1st Order Perturbation Theory - Equilibrium solvation”.

In Step 4B, the energy of the ground state is determined using the first excited state optimized geometry

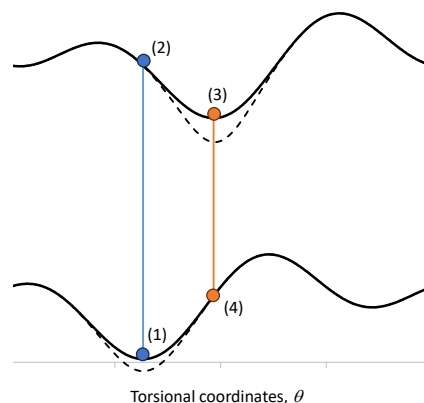

**Figure S3** Energies were determined for the ground state,  $S_0$ , and the excited state,  $S_1$ , in, both the Franck-Condon Region (1) and (2) at the potential energy minimum of the  $S_1$  state, (3) and (4), respectively. The calculations were performed with TD-DFT using CAM-B3LYP/6-31G+pd as described in the text.

(geom=checkpoint) via a non-equilibrium solvation calculation in solution. In addition, the solvent reaction field in equilibrium with the first excited state density (nonequilibrium=read, guess=read) is also calculated. The geometry of the molecule and its reaction field of the solvent are obtained from the corrected linear-response excited state calculation (oldchk=step4A.chk) above.

```
--link1--
%oldchk=step4A.chk
%chk=step4B.chk

#p cam-b3lyp/6-31+g(d,p)/def2sv
scrfl=(solvent=acetone,nonequilibrium=read)
guess=read NoSymm
geom=checkpoint polar
```

The ground state energy in the output file is described in the “SCF Done: E(RCAM-B3LYP)” section. The emission energy is obtained by subtracting the energy of step 4B from step 4A. The entire procedure is derived from an article published by Ciro Guido and Stefano Caprasecca.<sup>3-7</sup>

## References

1. Turro, N. J.; Ramamurthy, V.; Scaiano, J. C., *Principles of Molecular Photochemistry: An Introduction*. University Science Books: 2009.
2. Frisch, M. J.; Trucks, G. W.; Schlegel, H. B.; Scuseria, G. E.; Robb, M. A.; Cheeseman, J. R.; Scalmani, G.; Barone, V.; Petersson, G. A.; Nakatsuji, H.; Li, X.; Caricato, M.; Marenich, A. V.; Bloino, J.; Janesko, B. G.; Gomperts, R.; Mennucci, B.; Hratchian, H. P.; Ortiz, J. V.; Izmaylov, A. F.; Sonnenberg, J. L.; Williams, Ding, F.; Lipparini, F.; Egidi, F.; Goings, J.; Peng, B.; Petrone, A.; Henderson, T.; Ranasinghe, D.; Zakrzewski, V. G.; Gao, J.; Rega, N.; Zheng, G.; Liang, W.; Hada, M.; Ehara, M.; Toyota, K.; Fukuda, R.; Hasegawa, J.; Ishida, M.; Nakajima, T.; Honda, Y.; Kitao, O.; Nakai, H.; Vreven, T.; Throssell, K.; Montgomery Jr., J. A.; Peralta, J. E.; Ogliaro, F.; Bearpark, M. J.; Heyd, J. J.; Brothers, E. N.; Kudin, K. N.; Staroverov, V. N.; Keith, T. A.; Kobayashi, R.; Normand, J.; Raghavachari, K.; Rendell, A. P.; Burant, J. C.; Iyengar, S. S.; Tomasi, J.; Cossi, M.; Millam, J. M.; Klene, M.; Adamo, C.; Cammi, R.; Ochterski, J. W.; Martin,

- R. L.; Morokuma, K.; Farkas, O.; Foresman, J. B.; Fox, D. J. *Gaussian 16 Rev. C.01*, Wallingford, CT, 2016.
- Guido, C.; Caprasecca, S., *How to perform corrected Linear Response calculations in G09*. 2016.
  - Caricato, M.; Mennucci, B.; Tomasi, J.; Ingrosso, F.; Cammi, R.; Corni, S.; Scalmani, G., Formation and relaxation of excited states in solution: A new time dependent polarizable continuum model based on time dependent density functional theory. *Journal of Chemical Physics* **2006**, *124* (12), 13.
  - Guido, C. A.; Jacquemin, D.; Adamo, C.; Mennucci, B., Electronic Excitations in Solution: The Interplay between State Specific Approaches and a Time-Dependent Density Functional Theory Description. *Journal of Chemical Theory and Computation* **2015**, *11* (12), 5782-5790.
  - Marenich, A. V.; Cramer, C. J.; Truhlar, D. G.; Guido, C. A.; Mennucci, B.; Scalmani, G.; Frisch, M. J., Practical computation of electronic excitation in solution: vertical excitation model. *Chemical Science* **2011**, *2* (11), 2143-2161.
  - Corni, S.; Cammi, R.; Mennucci, B.; Tomasi, J., Electronic excitation energies of molecules in solution within continuum solvation models: Investigating the discrepancy between state-specific and linear-response methods. *Journal of Chemical Physics* **2005**, *123* (13), 10.
  - Yanai, T.; Tew, D. P.; Handy, N. C., A new hybrid exchange–correlation functional using the Coulomb-attenuating method (CAM-B3LYP). *Chemical Physics Letters* **2004**, *393* (1), 51-57.
  - Tomasi, J.; Mennucci, B.; Cammi, R., Quantum mechanical continuum solvation models. *Chemical Reviews* **2005**, *105* (8), 2999-3093.
  - Tomasi, J.; Mennucci, B.; Cancès, E., The IEF version of the PCM solvation method: an overview of a new method addressed to study molecular solutes at the QM ab initio level. *Journal of Molecular Structure: THEOCHEM* **1999**, *464* (1), 211-226.
